# Supplementary material for: Role of Single Nucleotide Polymorphism L55M in the Paraoxonase 1 Gene as a Risk and Prognostic Factor in Acute Coronary Syndrome
Source: MDPI journal article supplement (doi:10.3390/cimb44120403), 2022-11-27
Supplement: s1 [file s1]

**Figure S1.** The Kaplan Mayer survival curves of patients with different PON1 L55M genotypes and diagnosis after 1 year of follow-up period. 3A- the whole group with ACS; 3B-patients with STEMI; 3C – patients with NSTEACS.

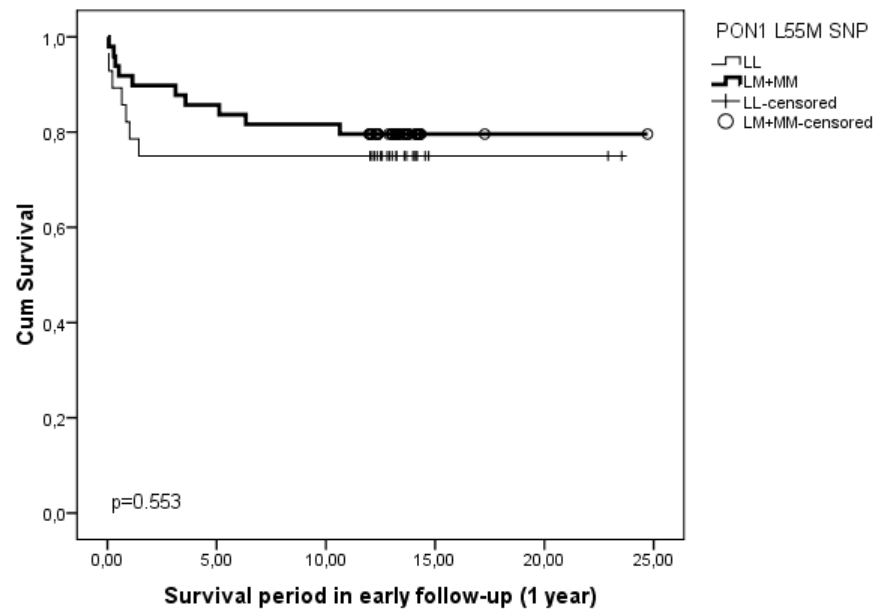

**Figure S1. A.**

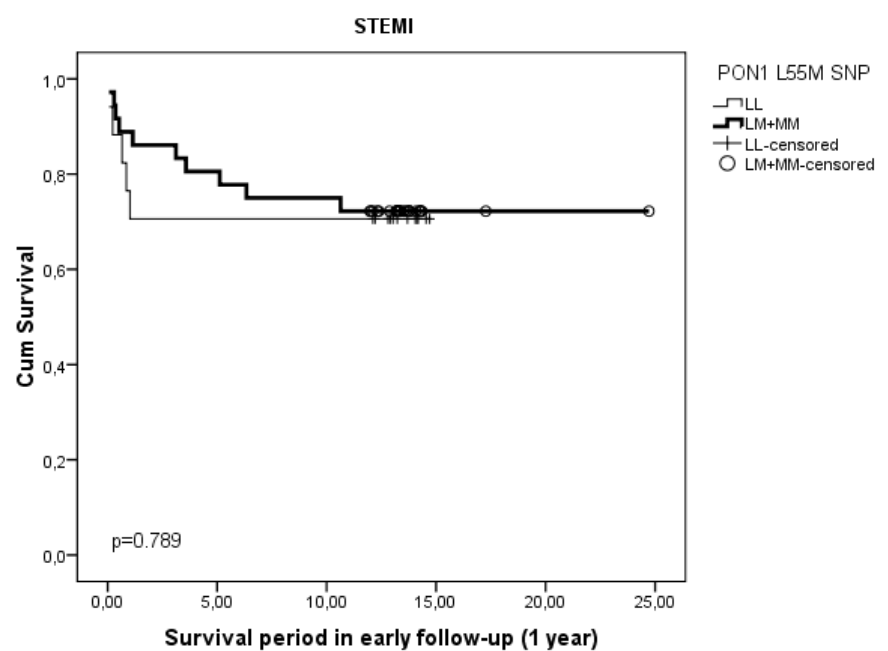

**Figure S1. B.**

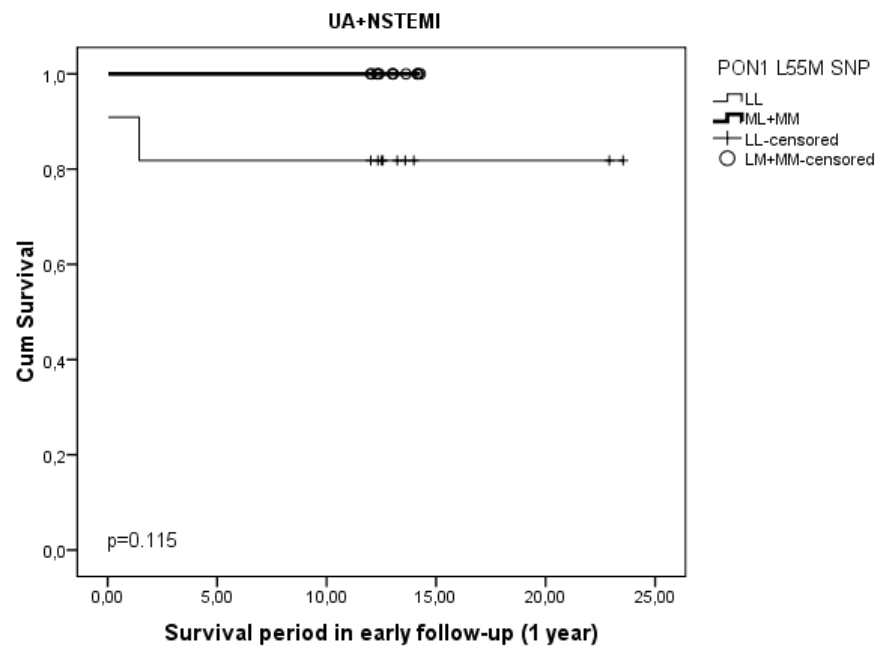

**Figure S1. C.**

**Figure S2.** The Kaplan Mayer survival curves for 5 year (4A) and 9 year (4B) follow-up of the patients from the whole group with ACS but with different PON1 L55M genotypes. 4C- The Kaplan Mayer survival curves for 9 year follow-up of the patients with NSTEMACS but with different PON1 L55M genotypes.

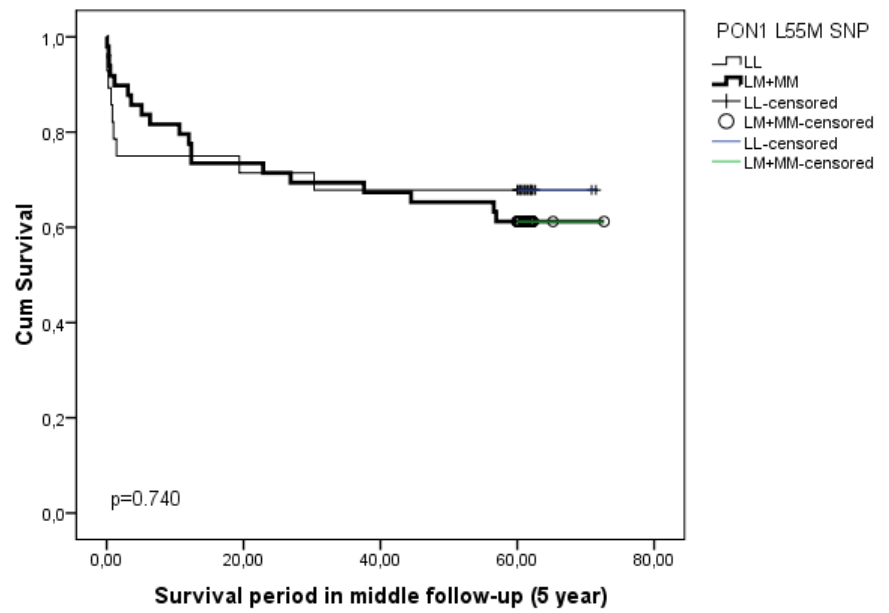

Figure S2. A.

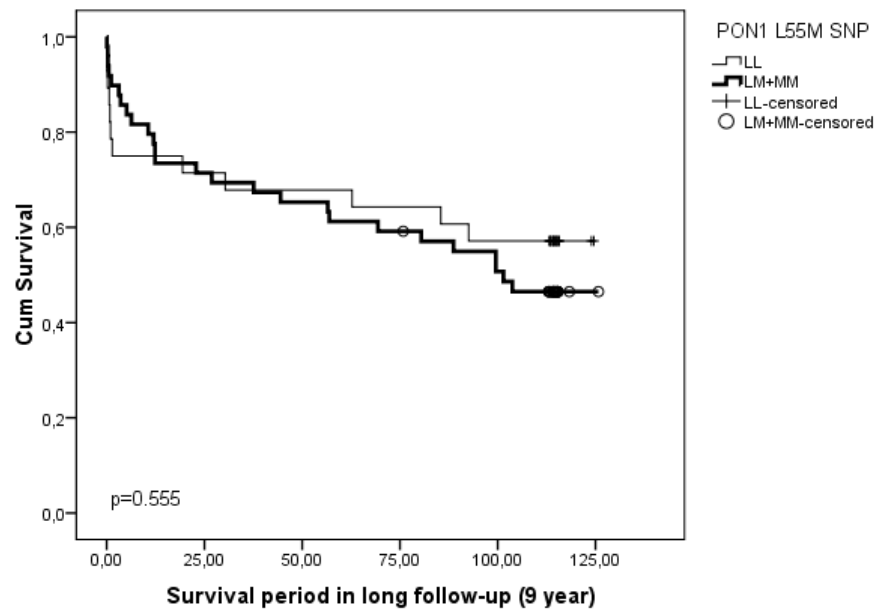

Figure S2. B.

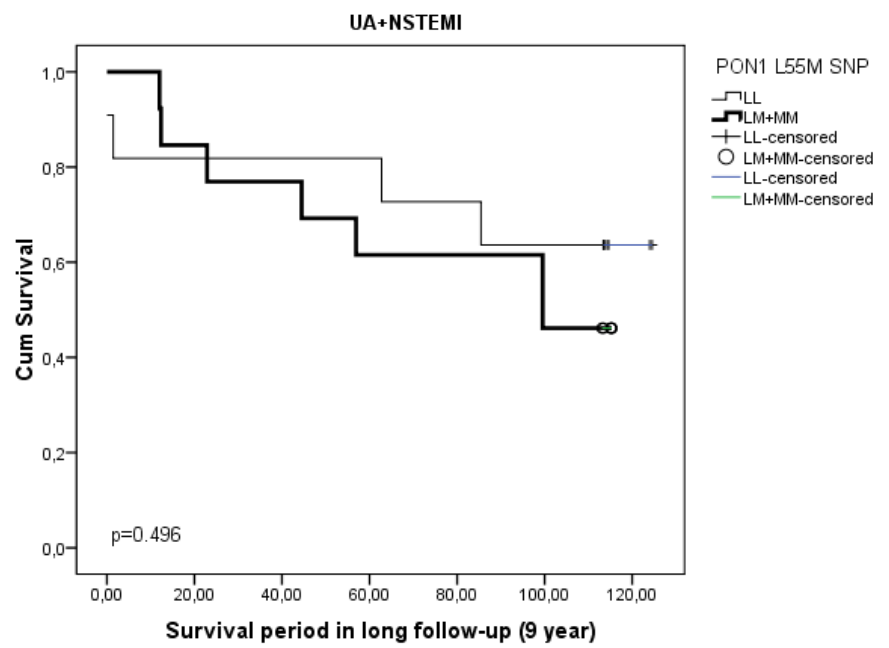

**Figure S2. C.**
